# Supplementary material for: Nanopillar array-based electrochemical aptamer sensor for STX sensitivity detection
Source: Royal Society of Chemistry journal article supplement (doi:10.1039/d4ay00932k), 2024-01-01
Supplement: d4ay00932k1.pdf [file d4ay00932k1.pdf]

## Supporting Information

### Nanopillar array-based electrochemical aptamer sensor for STX sensitivity detection

Jinsong Li<sup>1</sup>, Weixian Zheng<sup>2</sup>, Ya Gao<sup>1</sup>, Xinyu Liu<sup>1</sup>, Zhongbo Li<sup>1\*</sup> and Lijun Zhang<sup>1\*</sup>

1. Anhui Provincial Engineering Center for High-Performance Biobased Nylons, Anhui Engineering Research Center for Highly Functional Fiber Products for Automobiles, School of Materials and Chemistry, Anhui Agricultural University, China.

2. Biotechnology center of Anhui Agricultural University, Anhui Agricultural University, Hefei, 230009, China.

E-mail: [zbli@ahau.edu.cn](mailto:zbli@ahau.edu.cn) (Zhongbo Li), [Ljunzhang@ahau.edu.cn](mailto:Ljunzhang@ahau.edu.cn) (Lijun Zhang)

The anti-STX aptamers and other DNA strands used in this work are as follows: aptamer modified with 3'-methylene blue (MB-Apt, HS 5'-TTTTT TTG AGG GTC GCA TCC CGT GGA AAC AGG TTC ATT G-3' MB) and T5 (a short DNA strand containing 5 thymine bases) (HS 5'-TTTTT-3')

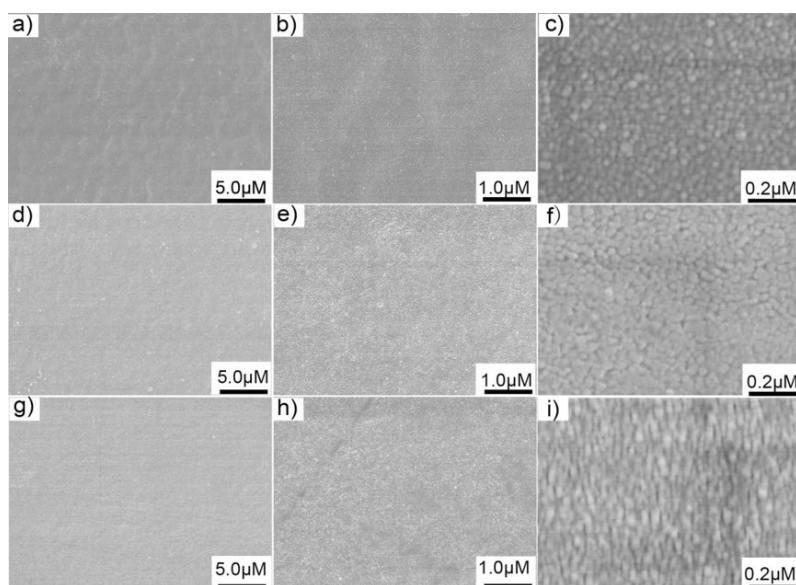

**Fig. S1** SEM images of (a)-(c) Au@PAN electrode, (d)-(f) MB-Apt/Au@PAN electrode and (g)-(i) STX+T5/MB-Apt/Au@PAN electrode

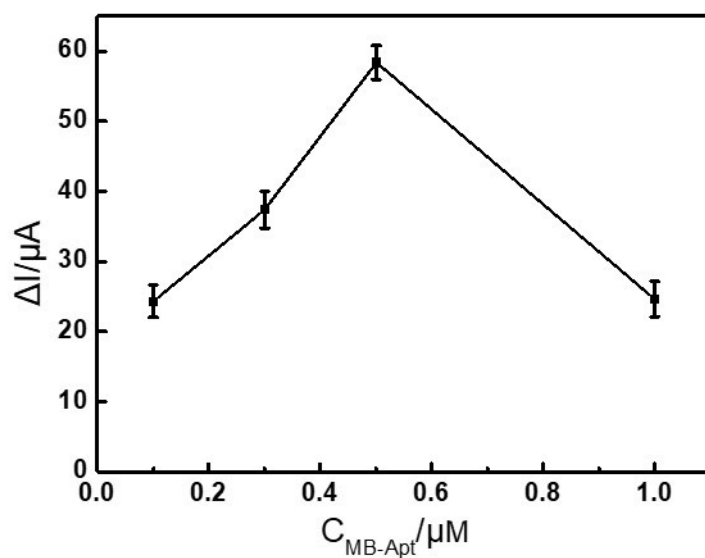

**Fig. S2** The relationship between MB-Apt concentration and the relative anodic peak current change ( $\Delta I$ ) obtained in 1 mM  $[\text{Fe}(\text{CN})_6]^{3-/4-}$  solution containing 0.1 M KCl. (Scan rate of DPV: 25 mV/S)

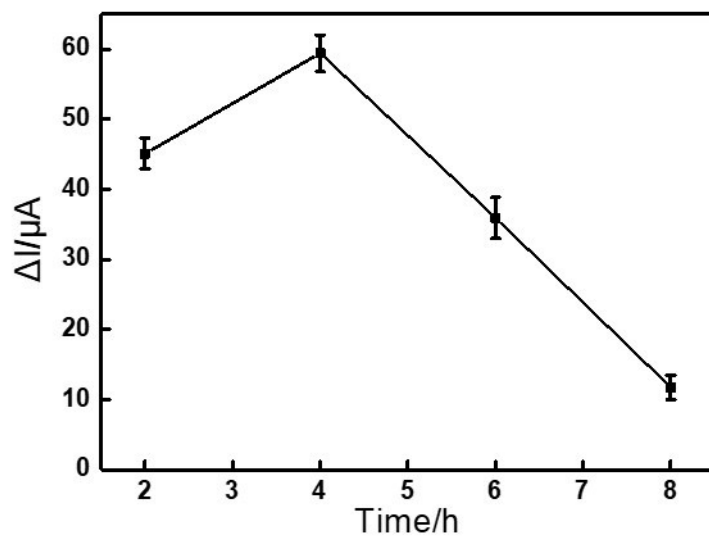

**Fig. S3** The effect of the immobilization time of MB-Apt on the relative anodic peak current change ( $\Delta I$ ) obtained in 1 mM  $[\text{Fe}(\text{CN})_6]^{3-/4-}$  solution containing 0.1 M KCl. (Scan rate of DPV: 25 mV/S)

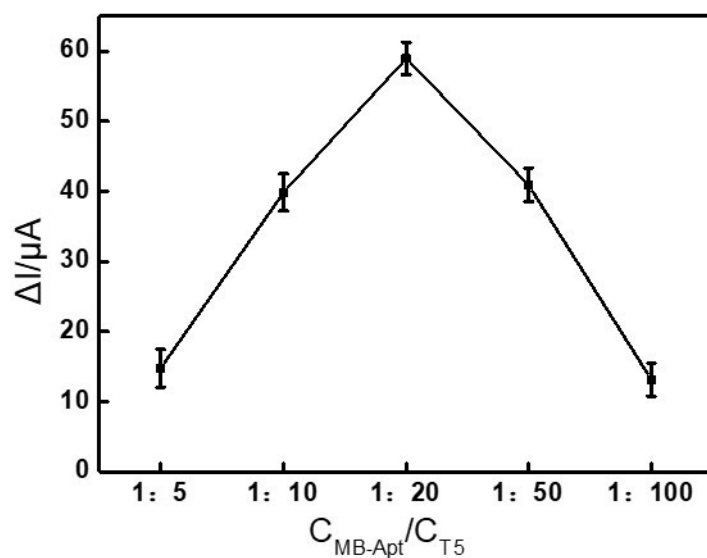

**Fig. S4** The relationship between the  $C_{\text{MB-Apt}}/C_{\text{T5}}$  and the relative anodic peak current ( $\Delta I$ ) obtained in 1 mM  $[\text{Fe}(\text{CN})_6]^{3-/4-}$  solution containing 0.1 M KCl. (Scan rate of DPV: 25 mV/S)

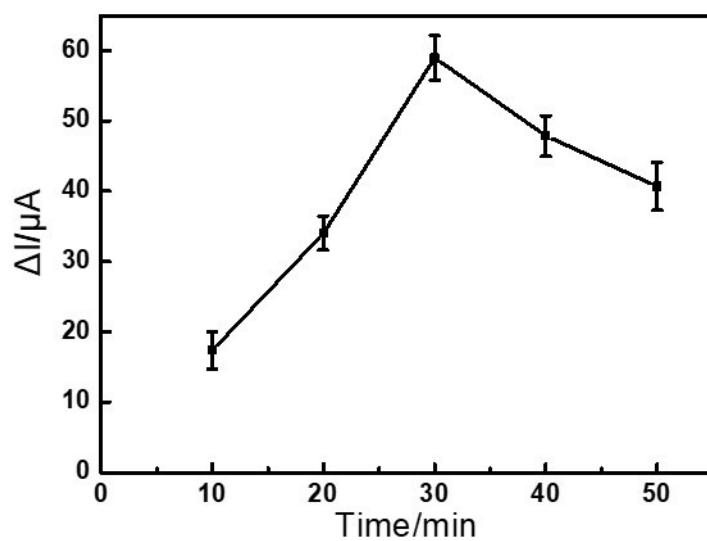

**Fig. S5** The effect of reaction time between STX and MB-Apt on the relative anodic peak current change ( $\Delta I$ ) obtained in 1 mM  $[\text{Fe}(\text{CN})_6]^{3-/4-}$  solution containing 0.1 M KCl. (Scan rate of DPV: 25 mV/S)

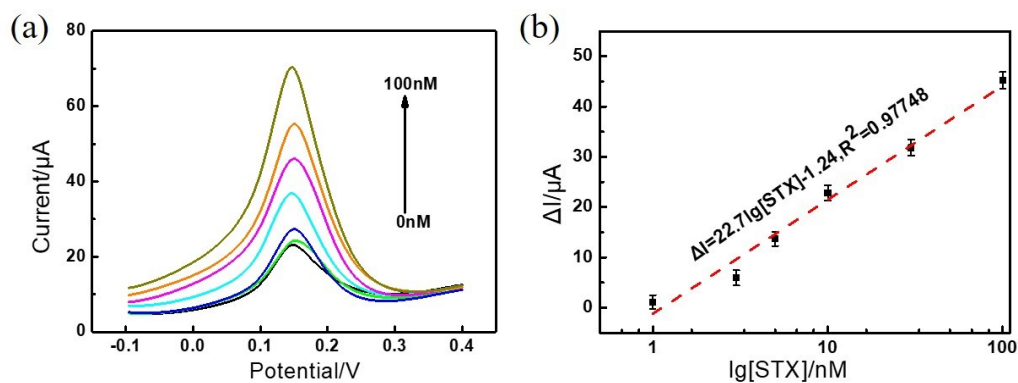

Fig. S6 (a) The DPVs of aptasensor without nanopillar arrays capture STX at different concentrations (1, 3, 5, 10, 30, 100 nM) and (b) The plot of DPV peaks changes ( $\Delta I$ ) vs. STX concentration (error bars: SD,  $n=3$ )

Table S1. Reproducibility of STX (30 nM) detection by the nanopillar array-based aptasensors

| $\Delta I$ |      |      |      |      |         | RSD (%) |
|------------|------|------|------|------|---------|---------|
| 1          | 2    | 3    | 4    | 5    | Average |         |
| 76.8       | 80.3 | 82.3 | 72.5 | 87.5 | 79.88   | 5.66    |

Table S2. Real samples analysis ( $n = 3$ )

| Real Samples | Added  | Detection | Recovery (%) | RSD (%) |
|--------------|--------|-----------|--------------|---------|
| shellfish    | 10 pM  | 10.3 pM   | 91-108       | 6.7     |
|              | 100 pM | 104 pM    | 87-110       | 8.1     |
|              | 3 nM   | 2.8 nM    | 85-106       | 7.8     |
|              | 10 nM  | 9.7 nM    | 98-107       | 6.9     |
|              | 30 nM  | 28.5 nM   | 94-112       | 8.3     |
